# Supplementary material for: The Homeostasis of Plasmodium falciparum-Infected Red Blood Cells
Source: PLOS journal article supplement (doi:10.1371/journal.pcbi.1000339), 2009-04-02
Supplement: S1 (10.1371/journal.pcbi.1000339.s001) [file journal.pcbi.1000339.s001]

301 Moved Permanently

# Moved Permanently

The document has moved here.

---

Apache Server at www.ploscompbiol.org Port 80
